# Supplementary material
Source: PubMed Central journal article supplement (PMC8713777)
Supplement: pnas.2112625118.sapp.pdf [file pnas.2112625118.sapp.pdf]

**Supplemental Information for**

**MEKK3-TGF $\beta$  crosstalk regulates inward arterial remodeling**

Hanqiang Deng, Yanying Xu, Xiaoyue Hu, Zhen W. Zhuang, Yuzhou Chang, Yewei Wang, Aglaia Ntokou, Martin A. Schwartz, Bing Su, Michael Simons

**This PDF file includes:**

**Supplemental Figure Legends**

**Figures S1-10**

**Table S1**

## Supplemental Figure Legends

**Figure S1. Loss of MEKK3 in ECs induces cardiac hypertrophy.** (A) Q-PCR analysis of *Mekk3* expression in isolated lung ECs, aortic smooth muscle cells and cardiomyocytes from Ctrl and *Mekk3*<sup>iECKO</sup> mice, n=3 per group. Data represent mean  $\pm$  SD. \*\*\*\* $P < 0.0001$ , ns: not significant, calculated by unpaired *t*-test. (B) Representative higher magnification H&E images of RV and LV for Ctrl and *Mekk3*<sup>iECKO</sup> mice at 4 weeks after tamoxifen injection. Scale bar: 500 $\mu$ m. (C) Representative right ventricle systolic pressure (RVSP) tracing for Ctrl and *Mekk3*<sup>iECKO</sup> mice at 4 weeks after tamoxifen injection. (D) Representative left ventricle systolic pressure (LVSP) tracing for Ctrl and *Mekk3*<sup>iECKO</sup> mice at 8 weeks after tamoxifen injection. (E) Representative systolic blood pressure (SBP) and diastolic blood pressure (DBP) tracing for Ctrl and *Mekk3*<sup>iECKO</sup> mice at 8 weeks after tamoxifen injection.

**Figure S2. Heart rate and ECG for Ctrl and *Mekk3*<sup>iECKO</sup> mice.** (A) Heart rate (BPM) for Ctrl and *Mekk3*<sup>iECKO</sup> mice at 2, 4 and 8 weeks after tamoxifen injection. n=5 mice per time point and per group. Data represent mean  $\pm$  SEM. ns: not significant, calculated by two-way ANOVA with Tukey's multiple comparison tests. (B) Representative electrocardiogram (ECG) tracing for Ctrl and *Mekk3*<sup>iECKO</sup> mice at 4 and 8 weeks after tamoxifen injection.

**Figure S3. *Mekk2* knockout mice don't develop hypertension.** (A) Western blot analysis of MEKK2 expression in Ctrl and *Mekk2*<sup>-/-</sup> lungs. (B) RVSP of Ctrl and *Mekk2*<sup>-/-</sup> mice at 6 months old. (C) LVSP of Ctrl and *Mekk2*<sup>-/-</sup> mice at 6 months old. (B-C) n=4 male mice for each group. Data represent mean  $\pm$  SEM. ns: not significant, calculated by unpaired *t*-test.

**Figure S4. MEKK3 deletion in ECs induces TGF $\beta$  signaling.** (A) Representative TGF $\beta$ R2 staining of Ctrl and *Mekk3*<sup>iECKO</sup> entire lungs at 4 weeks after tamoxifen

injection. Scale bar: 1mm. **(B-C)** Representative immunostaining and quantification of SM22 $\alpha$  **(B)**, and Collagen I **(C)** in lung sections from Ctrl and *Mekk3*<sup>ECKO</sup> mice at 4 weeks after tamoxifen injection. Scale bar: 25 $\mu$ m. **(D)** Representative Smad2/3 immunostaining and nuclear translocation quantification in lung sections from Ctrl and *Mekk3*<sup>ECKO</sup> mice at 4 weeks after tamoxifen injection. Scale bar: 25 $\mu$ m. n=4 mice per group. Data represent mean  $\pm$  SEM. \**P* < 0.05, calculated by Mann-Whitney U-test.

**Figure S5. Knockdown of MEKK3 in HPAECs induces EndMT.** **(A)** Q-PCR analysis of EndMT markers expression in human pulmonary artery endothelial cells (HPAECs) treated with Ctrl or MEKK3 siRNA. n=3 independent experiments. Data represent mean  $\pm$  SD. \*\**P* < 0.01, \*\*\**P* < 0.001, calculated by unpaired *t*-test. **(B)** Western blot analysis of EndMT markers expression in HPAECs treated with Ctrl or MEKK3 siRNA. **(C)** Immunostaining of LIN28 in Ctrl and *Mekk3*<sup>ECKO</sup> mice lungs. Scale bar: 50 $\mu$ m. Arrowheads point to endothelial cells expressing LIN28.

**Figure S6. Loss of MEKK3 in ECs impairs FGF2-ERK1/2-Let7 signaling pathway.** **(A-B)** ERK1/2 activation upon **(A)** FGF2 (100ng/ml) and **(B)** VEGF165 (50ng/ml) treatment in HUVECs treated with Ctrl or MEKK3 siRNA. **(C-D)** Smad1/5/9 activation upon **(C)** BMP9 (10ng/ml) and **(D)** BMP6 (50ng/ml) treatment in HUVECs treated with Ctrl or MEKK3 siRNA. **(E)** Q-PCR analysis of FGFR1 (n=6) expression in HUVECs treated with Ctrl or MEKK3 siRNA. Data represent mean  $\pm$  SEM. **(F)** Western blot analysis of FGFR1 expression in HUVECs treated with Ctrl or MEKK3 siRNA. ns: not significant, calculated by unpaired *t*-test.

**Figure S7. Additional images showing EndMT.** **(A-C)** Representative GFP and SMA staining in lung **(A)**, kidney **(B)**, and liver **(C)** from mTmG Ctrl and mTmG *Mekk3*<sup>ECKO</sup> mice at 4 weeks after tamoxifen injection. Scale bar: 50 $\mu$ m. Arrowheads point to endothelial cells expressing SMA.

**Figure S8. F4/80 staining in atherosclerotic plaque.**

(A) Representative F4/80 staining in brachiocephalic artery lesion from *Apoe*<sup>-/-</sup> mice and *Apoe*<sup>-/-</sup> *Mekk3*<sup>IECKO</sup> mice. Scale bar: 100 $\mu$ m.

**Figure S9. Suppression of TGF $\beta$ R signaling rescues MEKK3-knockout-induced**

**EndMT.** (A) Q-PCR analysis of MEKK3, SM22 $\alpha$ , fibronectin (FN) and N-Cadherin expression in HUVECs treated with Ctrl or MEKK3 siRNA in addition to TGF $\beta$ R inhibitor. (B) Western Blot and (C) Q-PCR analysis of EndMT markers expression in HUVECs treated with Ctrl or MEKK3 siRNA in addition to TGF $\beta$ R1/R2 siRNA. n=3 independent experiments. Data represent mean  $\pm$  SD. \*\**P* < 0.01, \*\*\**P* < 0.001, ns: not significant, calculated by one-way ANOVA with Tukey's multiple comparison tests.

**Figure S10. Negative control for immunohistochemistry staining with non-**

**immune species-matched isotype IgG.** Lung sections were blocked and incubated with indicated primary antibodies and its non-immune species-matched IgG at 4 $^{\circ}$ C overnight. Sections then were incubated with secondary antibodies at room temperature for 2h, finally mounted with DAPI. (A) Representative immunostaining of mouse isotype IgG, fibronectin and TGF $\beta$  with CD31 and DAPI. (B) Representative immunostaining of rabbit isotype IgG, p-Smad2 Ser465/467 and p-Smad3 Ser423/425 with CD31 and DAPI. Scale bar: 25 $\mu$ m.

**Figure S1****A**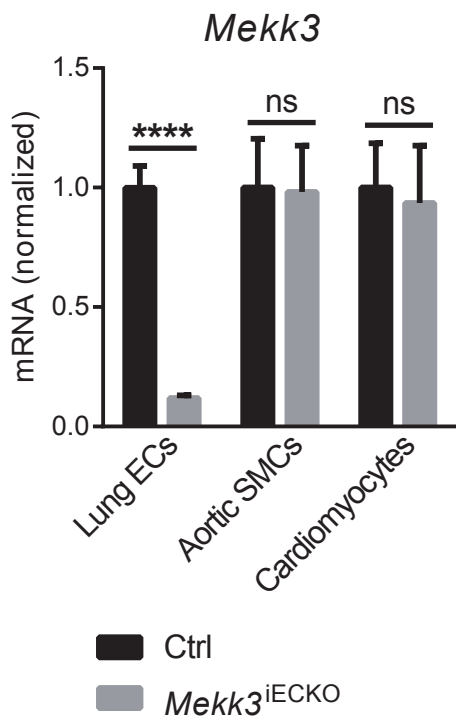**B**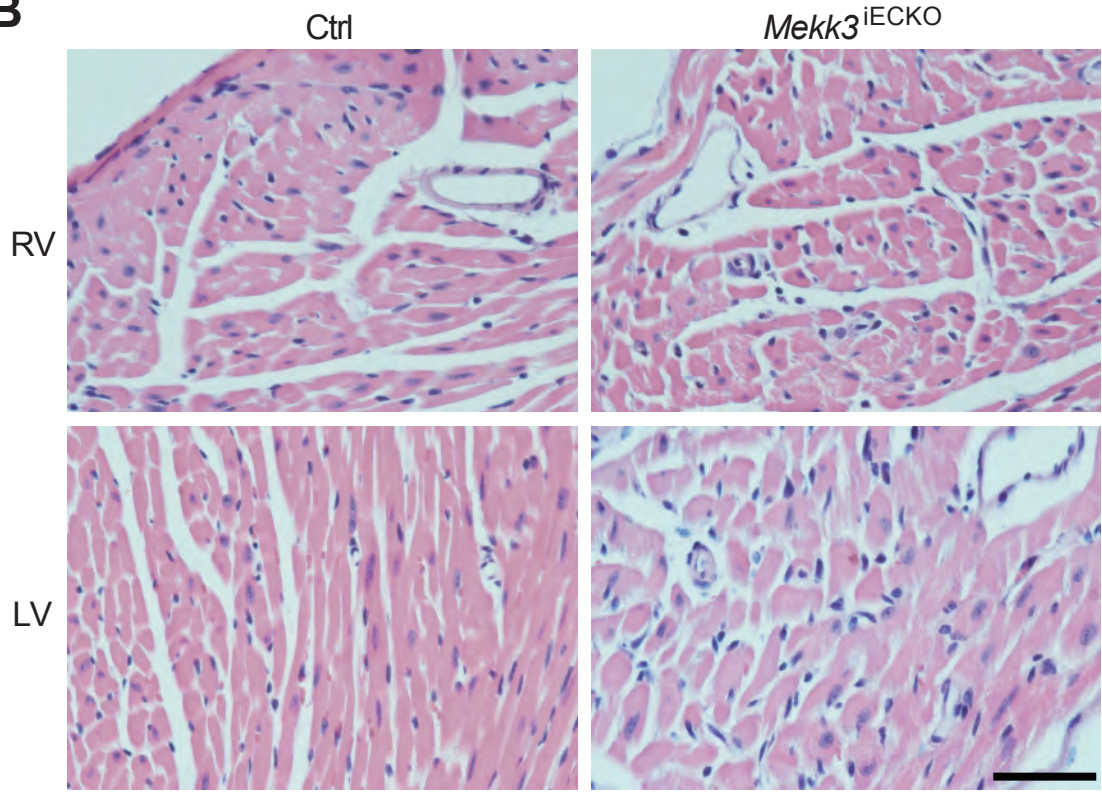**C**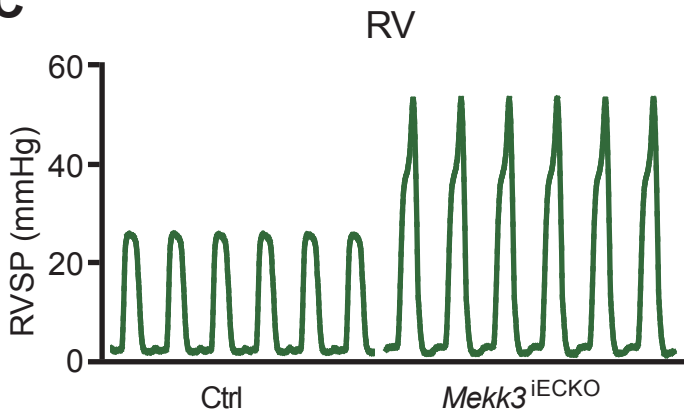**D**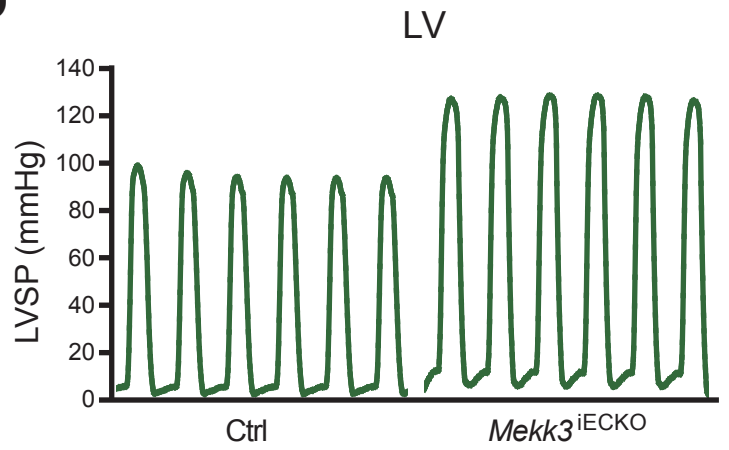**E**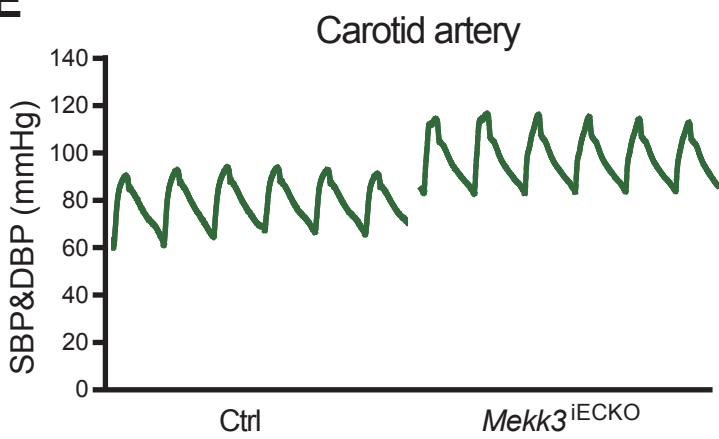

**Figure S2**

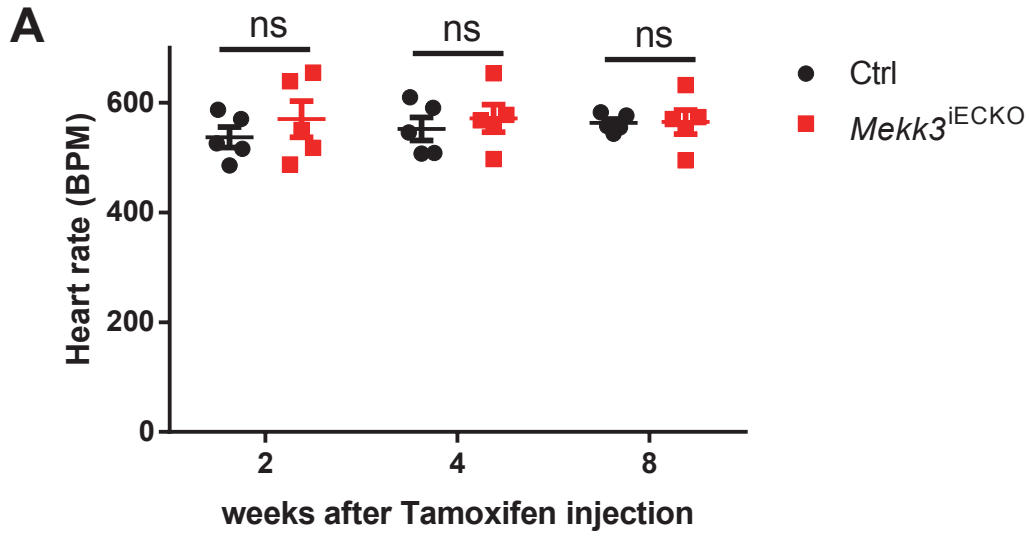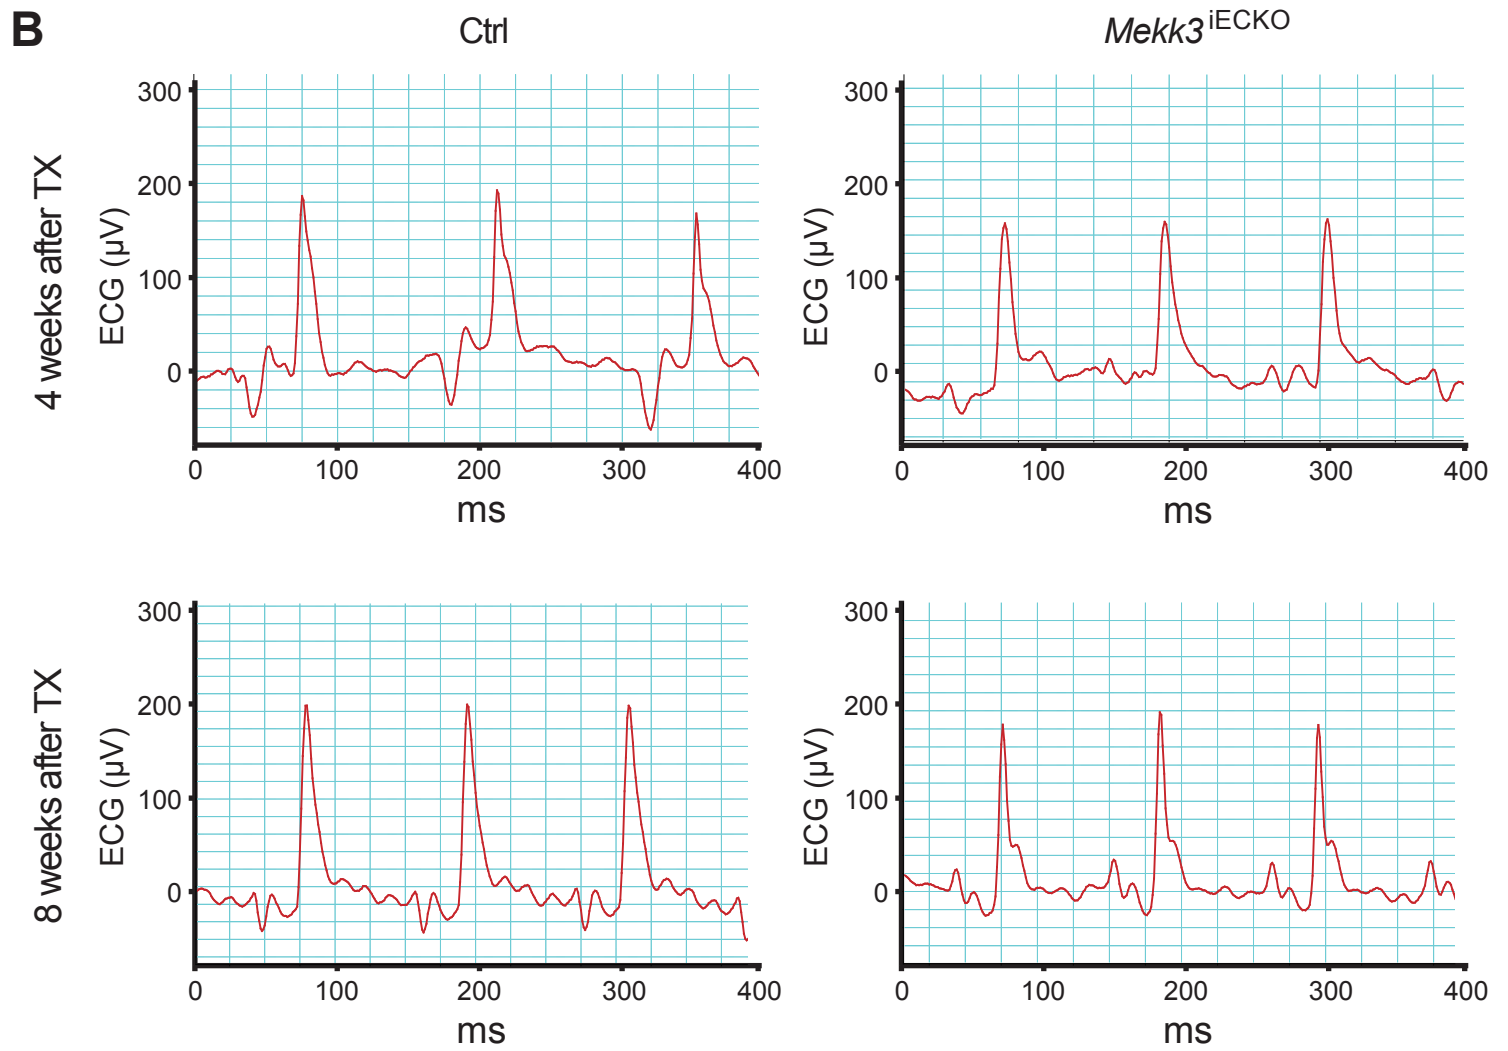

**Figure S3**

**A**

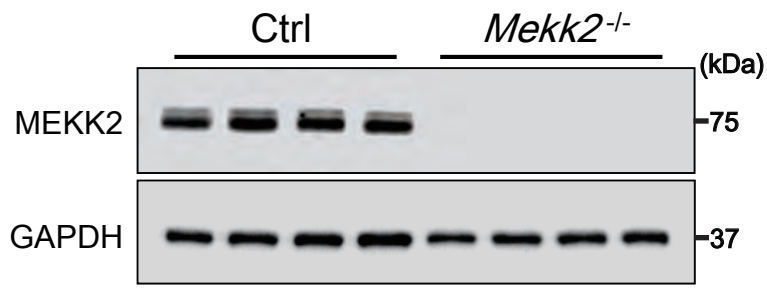

**B**

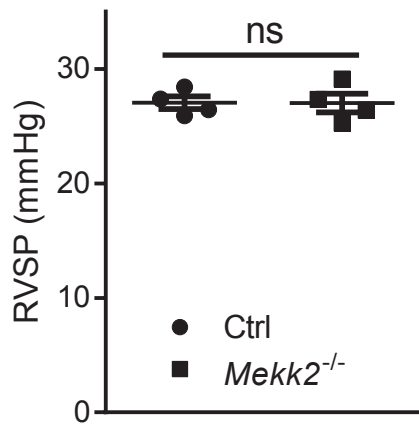

**C**

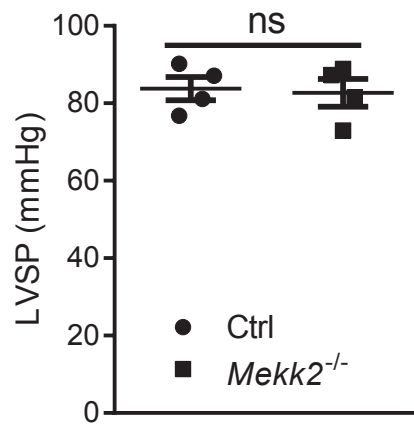

**Figure S4**

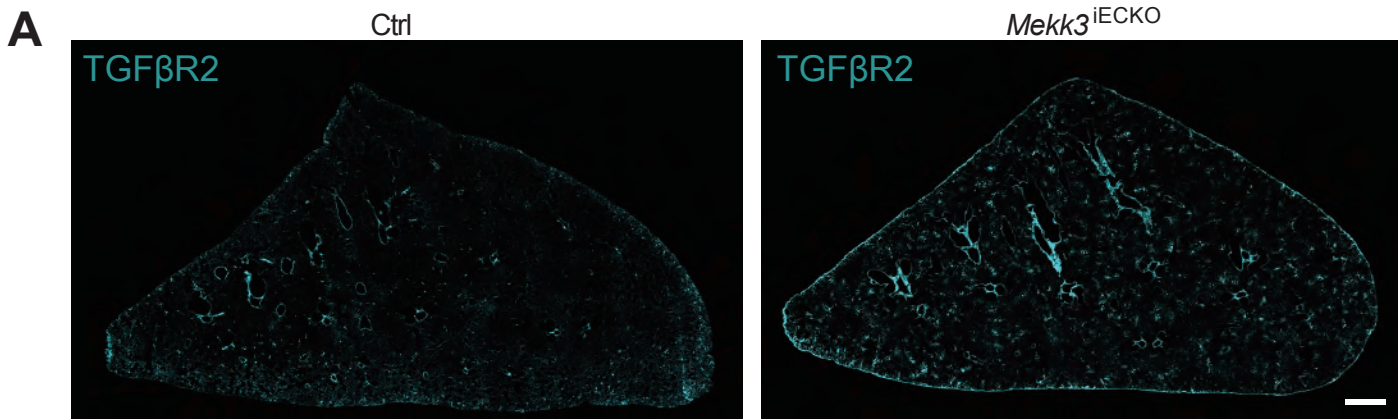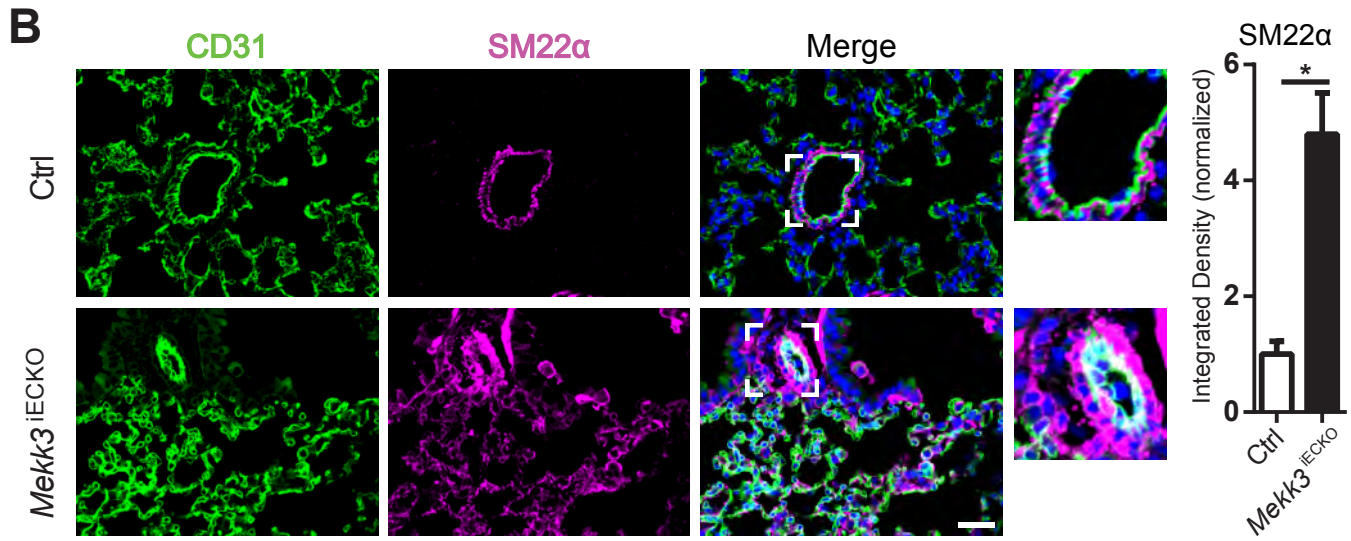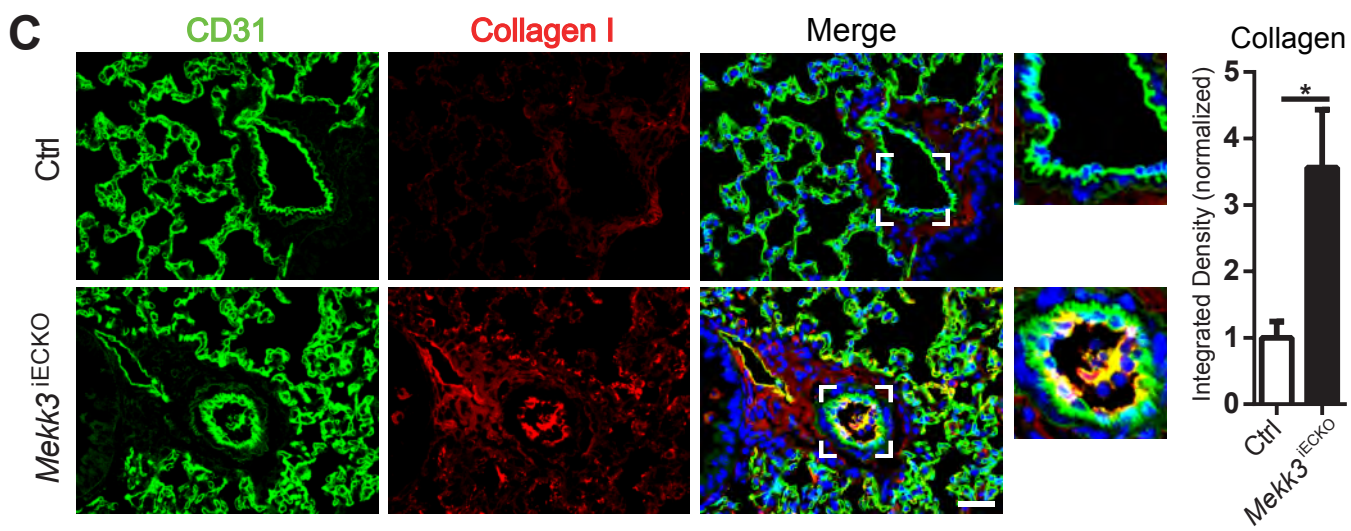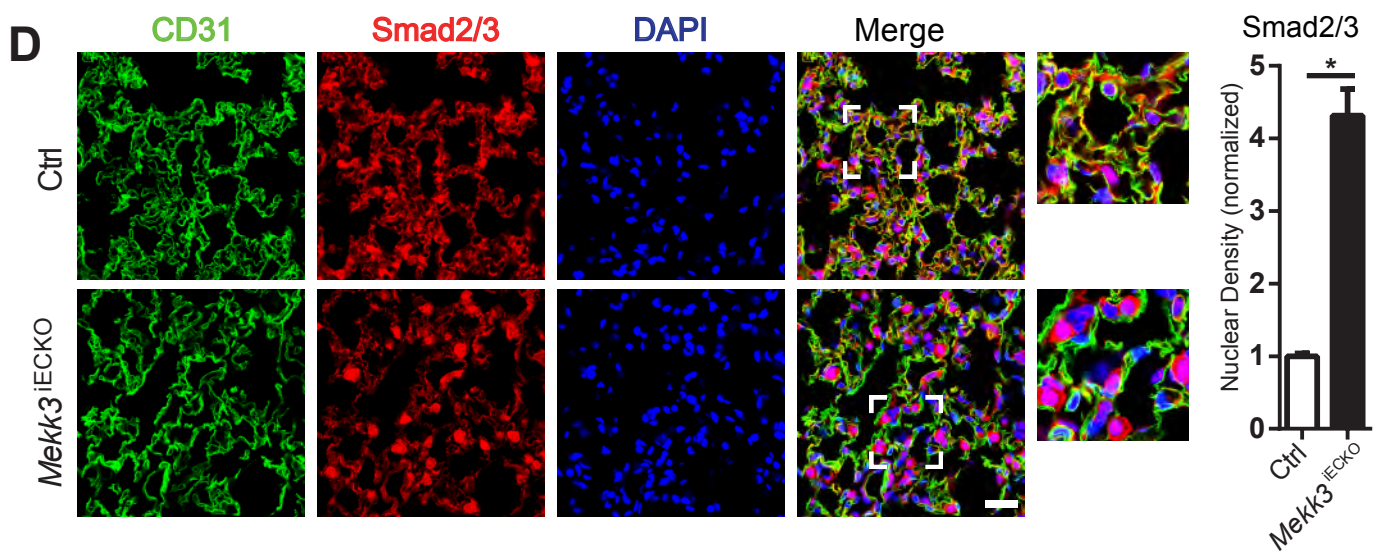



**Figure S5**

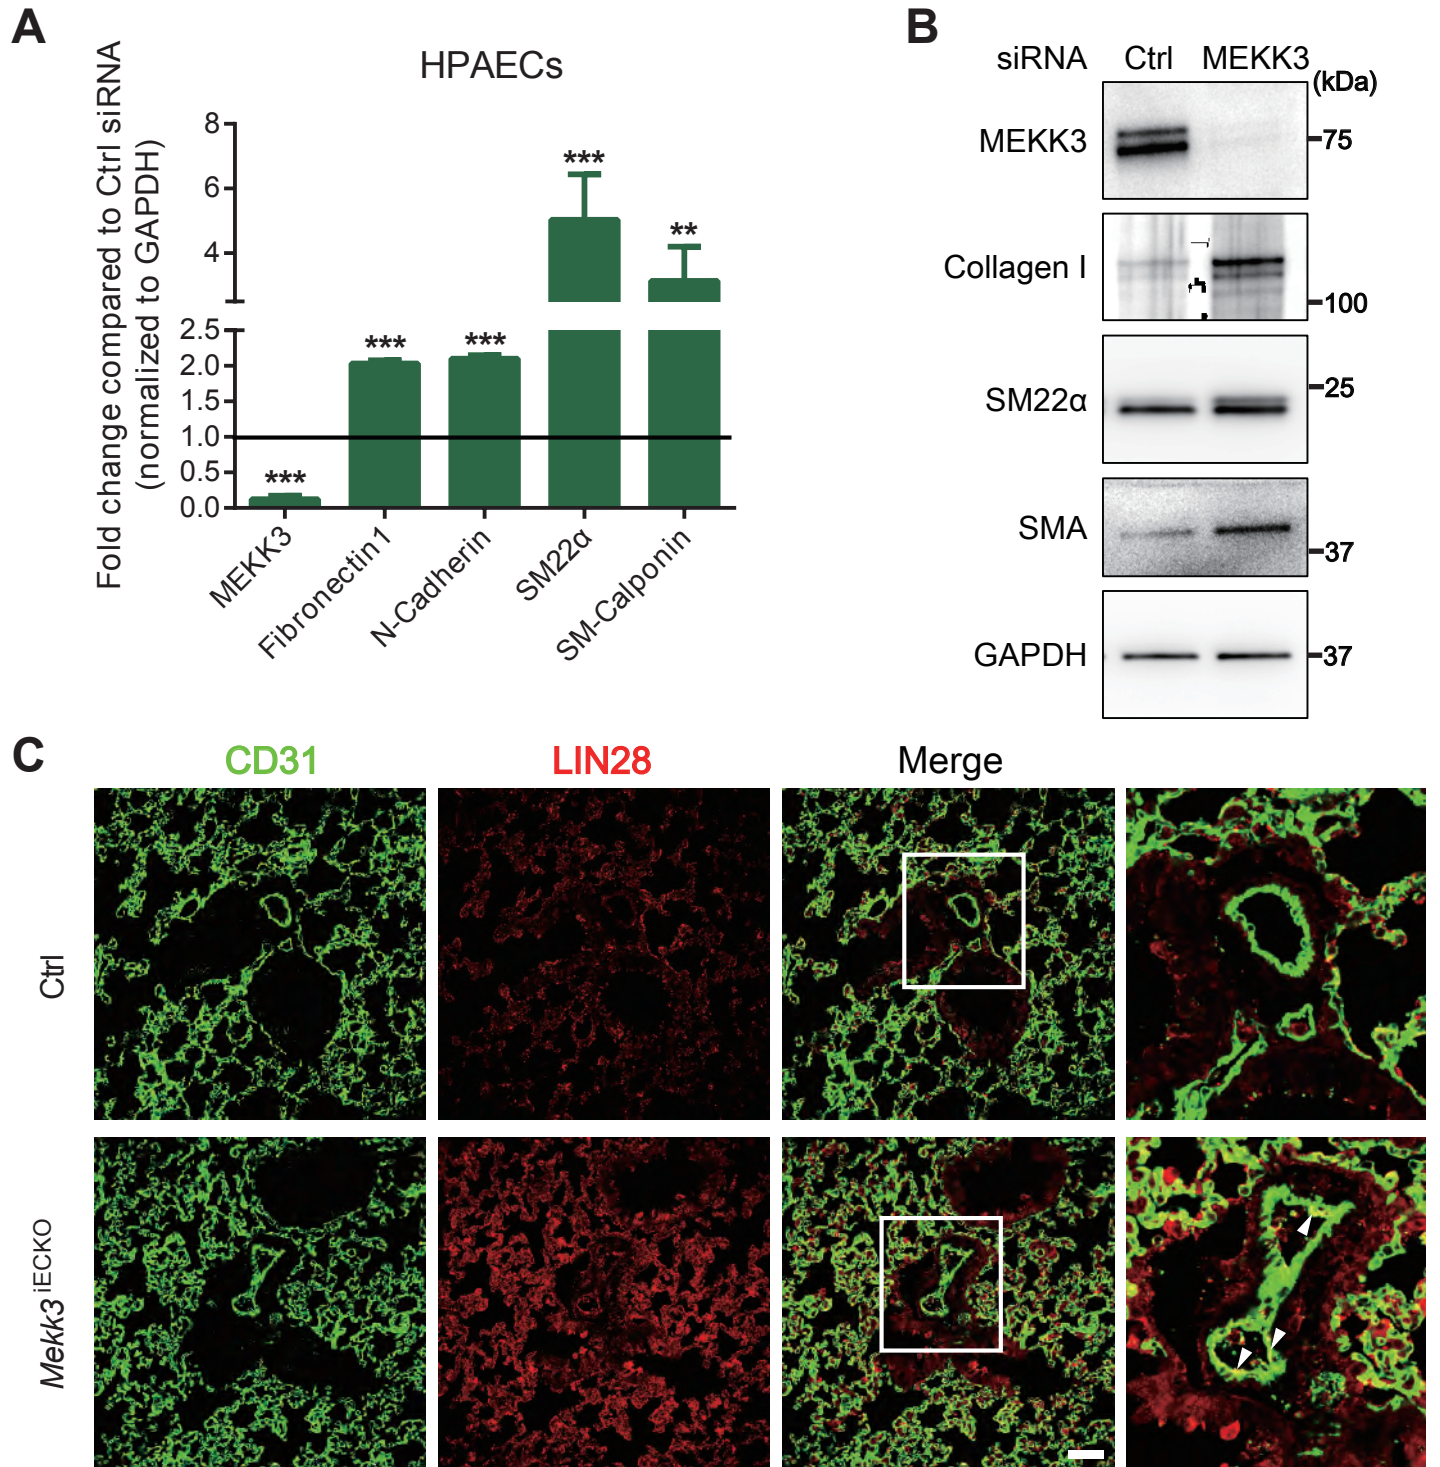

# Figure S6

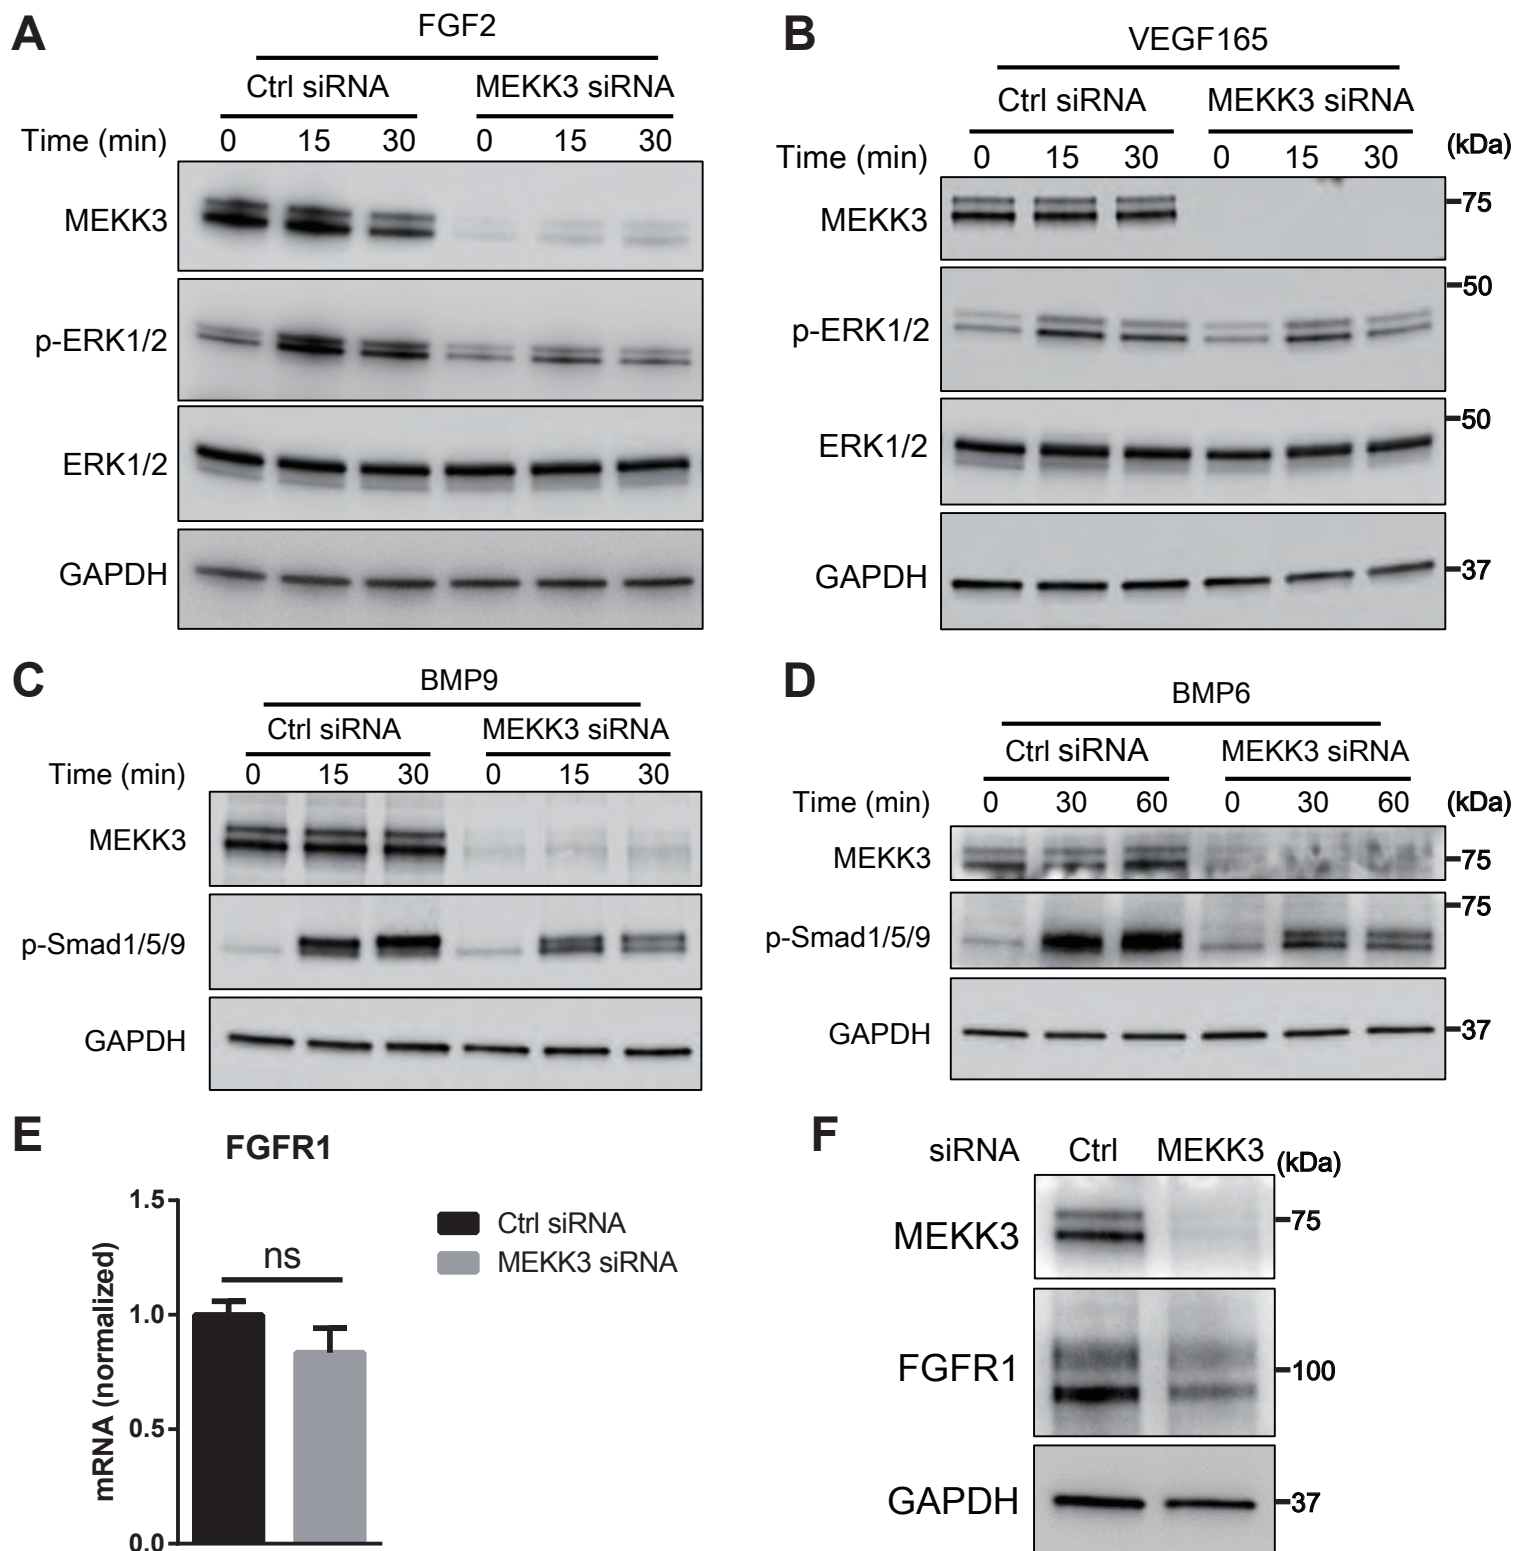

**Figure S7**

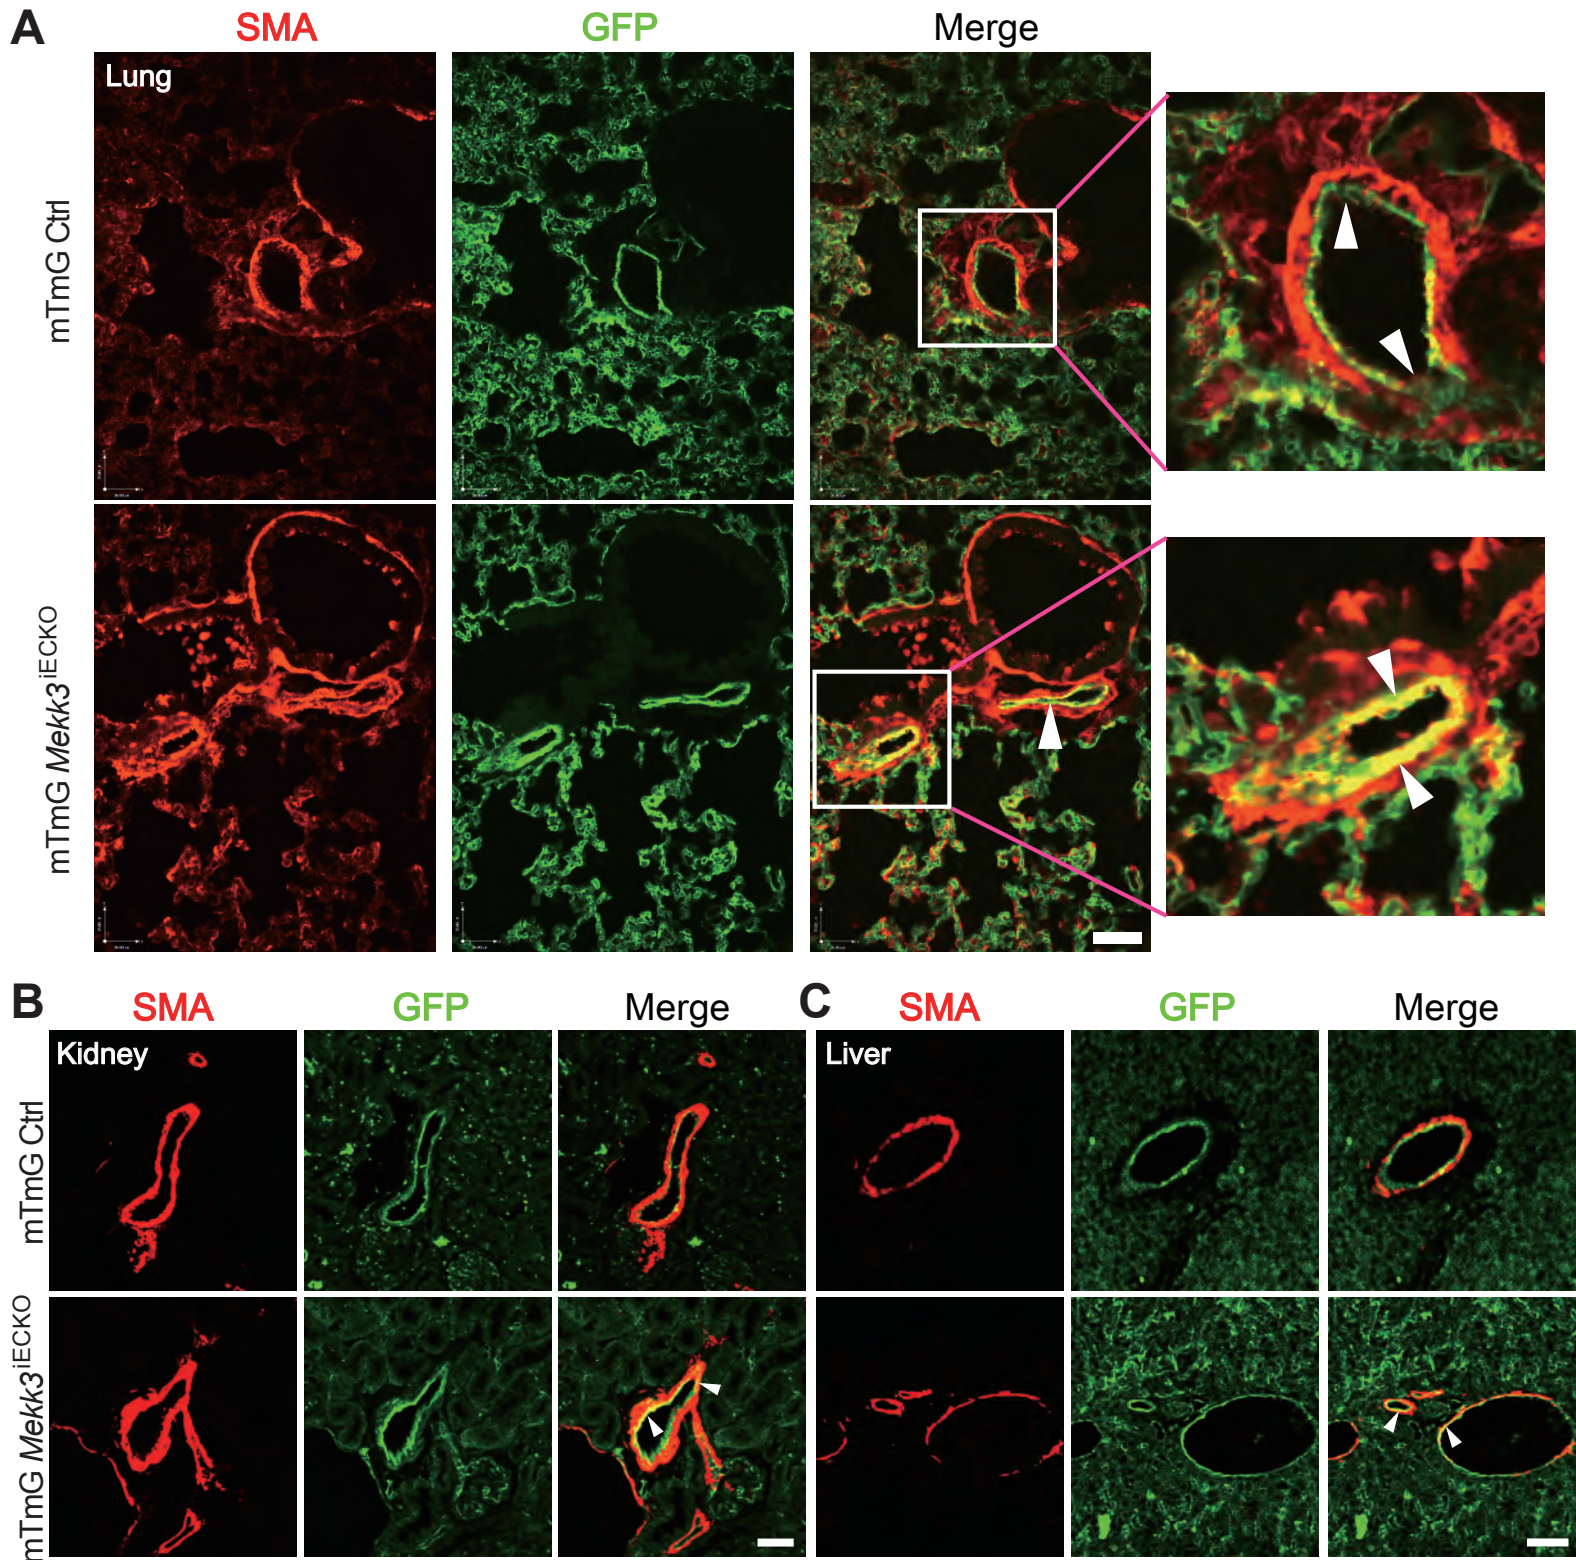

Figure S8

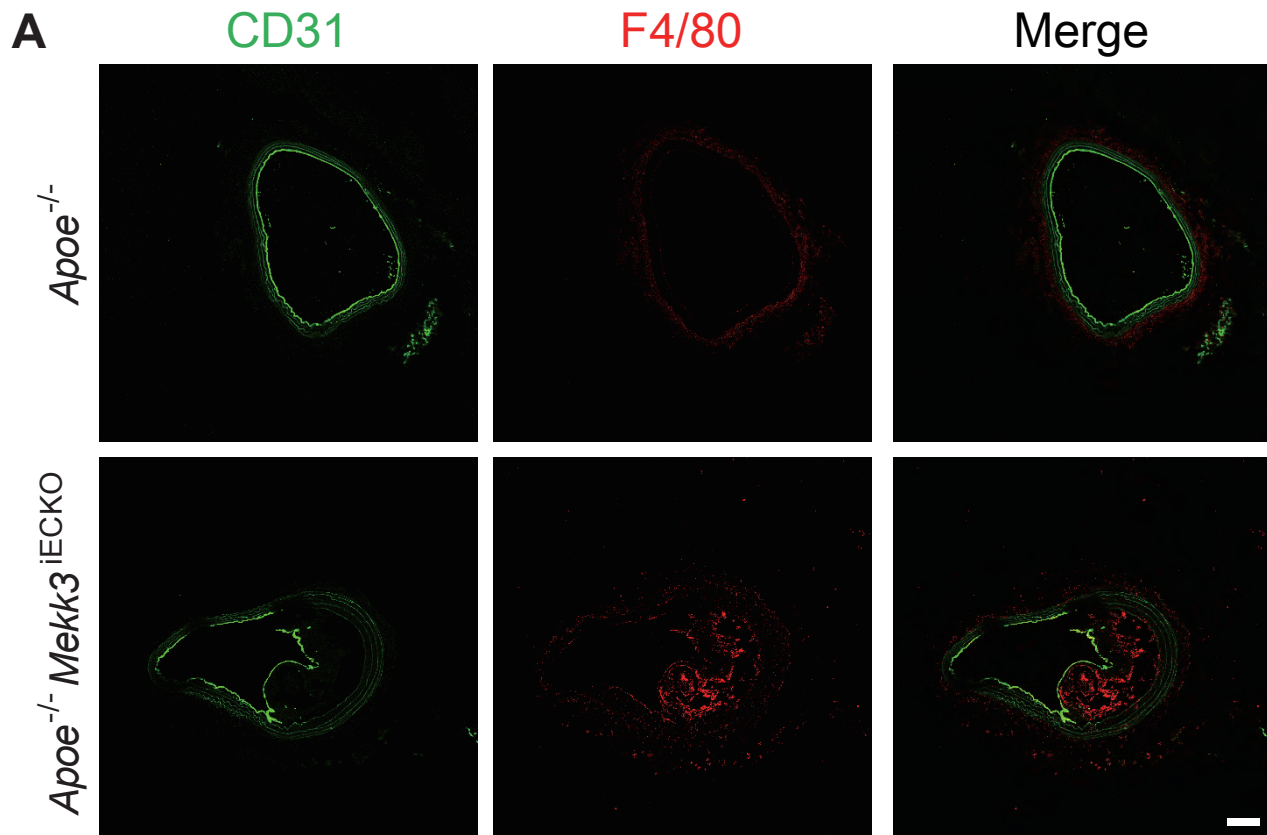

# Figure S9

## A

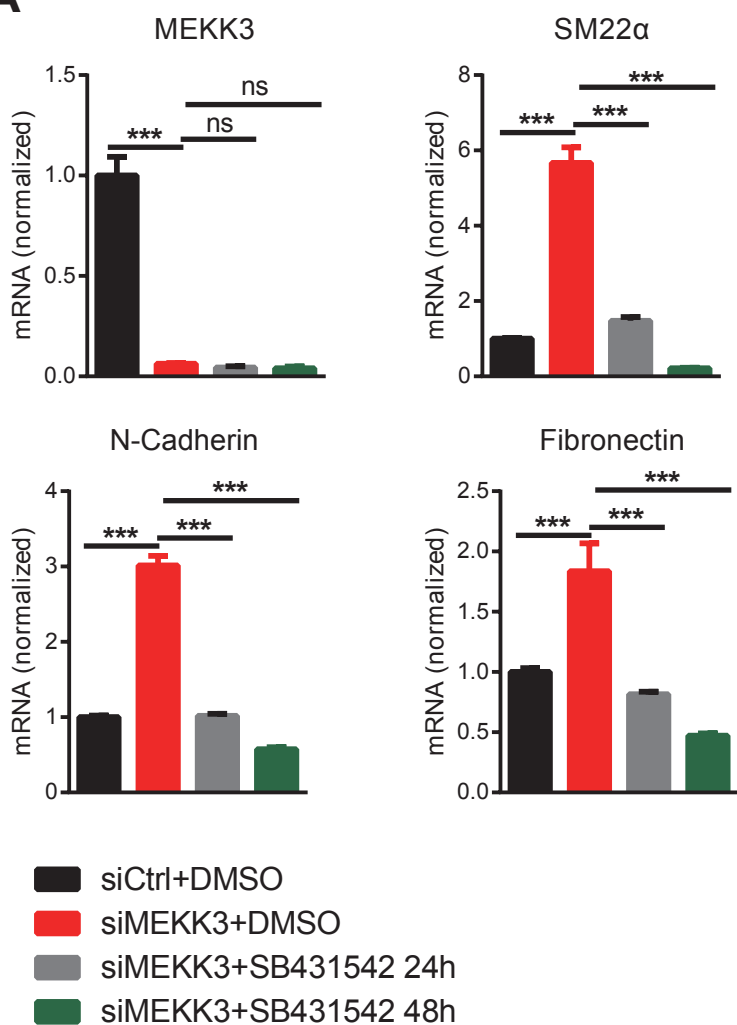

## B

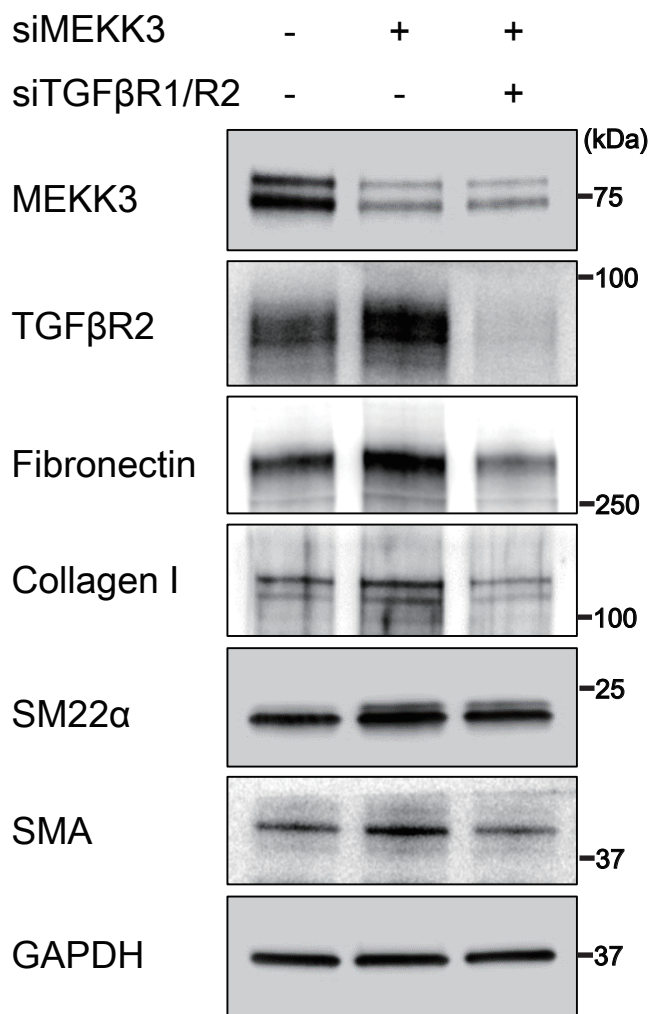

## C

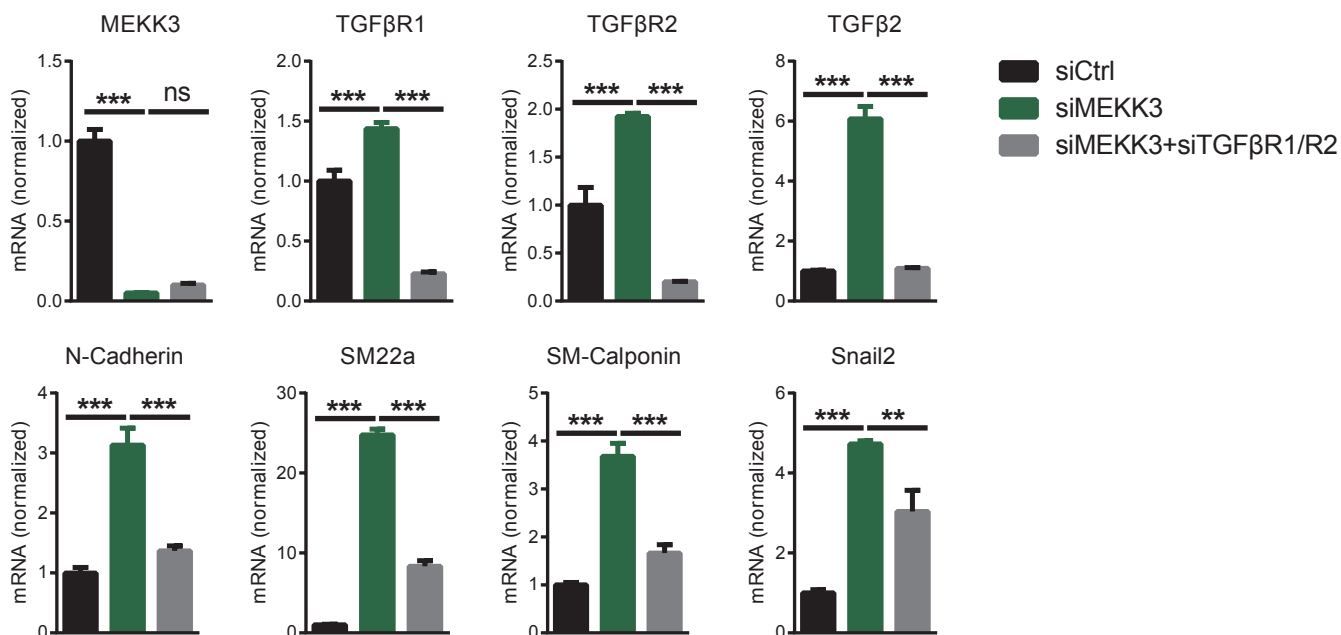

**Figure S10**

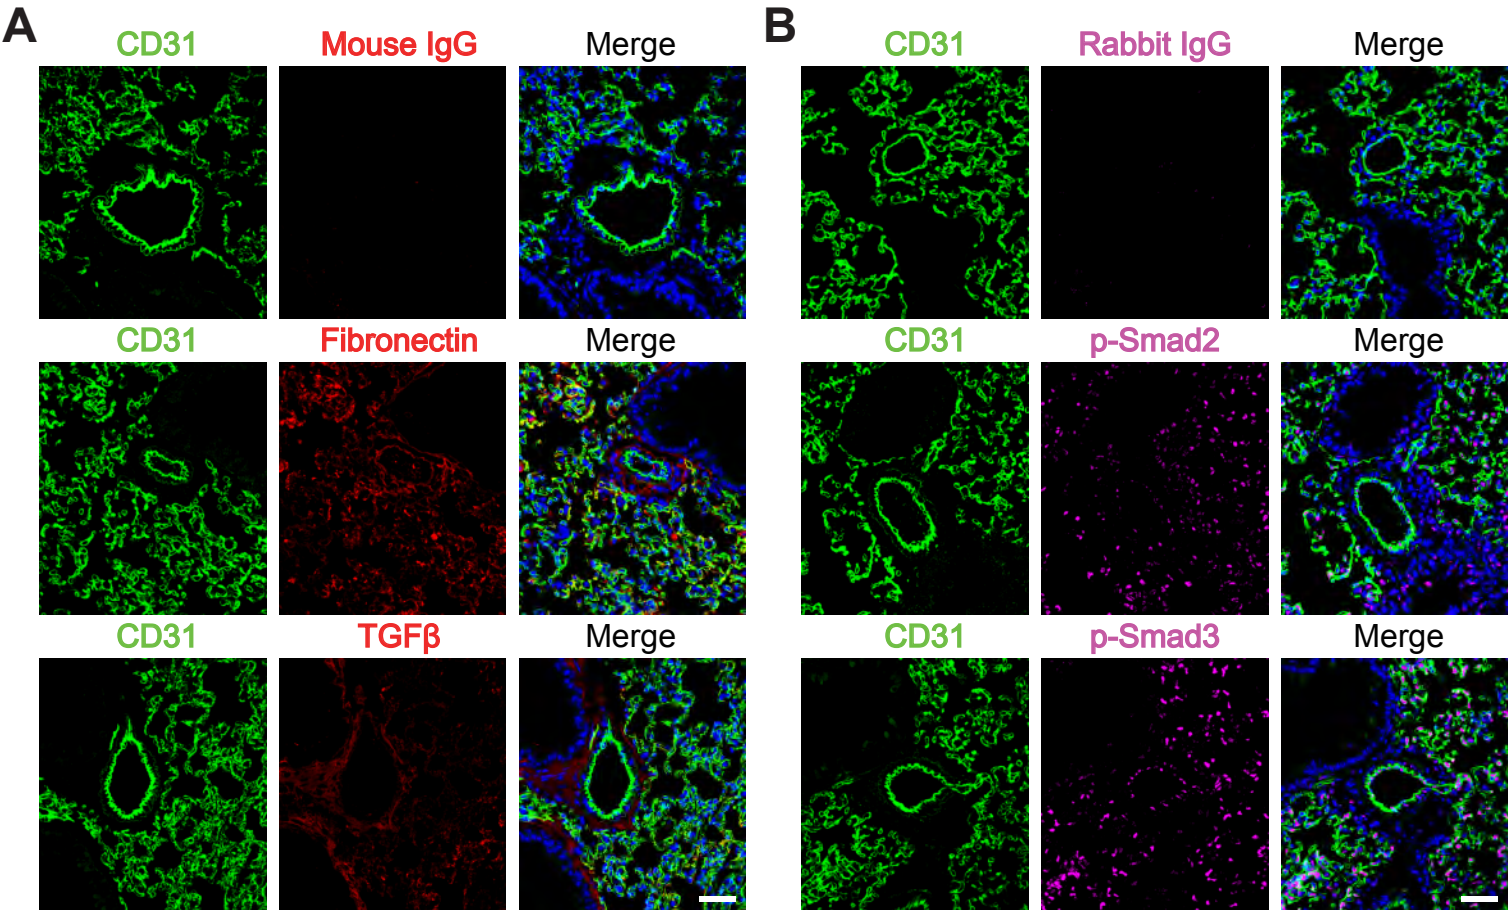

**Supplemental Table 1. List of qPCR primers used.**

| Genes                 | Sequences (5' to 3' )          |
|-----------------------|--------------------------------|
| hMEKK3-F              | CAGACAGGAATACTCAGATCGGG        |
| hMEKK3-R              | TCTTCTGCCATCACTGTAGTCC         |
| hGAPDH-F              | GGAGCGAGATCCCTCCAAAAT          |
| hGAPDH-R              | GGCTGTTGTCATACTTCTCATGG        |
| hFN1-F                | GAGAATAAGCTGTACCATCGCAA        |
| hFN1-R                | CGACCACATAGGAAGTCCCAG          |
| hCdh2-F               | AGCCAACCTTAACTGAGGAGT          |
| hCdh2-R               | GGCAAGTTGATTGGAGGGATG          |
| hNOS3-F               | TGATGGCGAAGCGAGTGAAG           |
| hNOS3-R               | ACTCATCCATACACAGGACCC          |
| hSnail2-F             | TGTGACAAGGAATATGTGAGCC         |
| hSnail2-R             | TGAGCCCTCAGATTTGACCTG          |
| hTGF $\beta$ 1-F      | GTACCTGAACCCGTGTTGCT           |
| hTGF $\beta$ 1-R      | GTATCGCCAGGAATTGTTGC           |
| hTGF $\beta$ 2-F      | ATGCGGCCTATTGCTTTAGA           |
| hTGF $\beta$ 2-R      | GTTGGCATTGTACCCTTTGG           |
| hTGF $\beta$ 3-F      | GCCTCAGTCTTTGGGATCTG           |
| hTGF $\beta$ 3-R      | GTGTGAGCTGGGAAGAGAGG           |
| hTGF $\beta$ R1-F     | CAGCTCTGGTTGGTGTGAGA           |
| hTGF $\beta$ R1-R     | ATGTGAAGATGGGCAAGACC           |
| hTGF $\beta$ R2-F     | TGAGTTCAACCTGGGAAACC           |
| hTGF $\beta$ R2-R     | GGTTGATGTTGTTGGCACAC           |
| hSM $\alpha$ -actin-F | CAAAGCCGGCCTTACAGAG            |
| hSM $\alpha$ -actin-R | AGCCCAGCCAAGCACTG              |
| hSM22 $\alpha$ -F     | GATTTTGGACTGCACTTCGC           |
| hSM22 $\alpha$ -R     | GTCCGAACCCAGACACAAGT           |
| hSM-calponin-F        | CTGGCTGCAGCTTATTGATG           |
| hSM-calponin-R        | CTGAGAGAGTGGATCGAGGG           |
| hLIN28a-F             | AGCGCAGATCAAAAGGAGACA          |
| hLIN28a-R             | CCTCTCGAAAGTAGGTTGGCT          |
| hLIN28b-F             | CATCTCCATGATAAACCGAGAGG        |
| hLIN28b-R             | GTTACCCGTATTGACTCAAGGC         |
| mGapdh-F              | AGGTTCGGTGTGAACGGATTTG         |
| mGapdh-R              | TGTAGACCATGTAGTTGAGGTCA        |
| mMekk3-F              | GCCAATATCCTCCGAGACTCAGCTGGGAAT |
| mMekk3-R              | CTTGAGAGCTCAGTACACTAGCTG       |
| mNos3-F               | TCAGCCATCACAGTGTTCCC           |
| mNos3-R               | ATAGCCCGCATAGCGTATCAG          |
| mFn1-F                | ATGTGGACCCCTCCTGATAGT          |

|           |                         |
|-----------|-------------------------|
| mFn1-R    | GCCCAGTGATTTTCAGCAAAGG  |
| mSnail2-F | TGGTCAAGAAACATTTCAACGCC |
| mSnail2-R | GGTGAGGATCTCTGGTTTTGGTA |
| mCdh2-F   | AGCGCAGTCTTACCGAAGG     |
| mCdh2-R   | TCGCTGCTTTCATACTGAACTTT |
| mCol3a1-F | ACGTAGATGAATTGGGATGCAG  |
| mCol3a1-R | GGGTTGGGGCAGTCTAGTG     |
| mSm22a-F  | CAACAAGGGTCCATCCTACGG   |
| mSm22a-R  | ATCTGGGCGGCCTACATCA     |
| mTgfb2-F  | TCGACATGGATCAGTTTATGCG  |
| mTgfb2-R  | CCCTGGTACTGTTGTAGATGGA  |
| mTgfr1-F  | CAGCTCCTCATCGTGTTGGTG   |
| mTgfr1-R  | GCACATACAAATGGCCTGTCTC  |
| mTgfr2-F  | CCGCTGCATATCGTCCTGTG    |
| mTgfr2-R  | AGTGGATGGATGGTCCTATTACA |
